# Supplementary material for: Fighting Microbial Infections from Escherichia coli O157:H7: The Combined Use of Three Essential Oils of the Cymbopogon Genus and a Derivative of Esculentin-1a Peptide
Source: MDPI journal article supplement (doi:10.3390/antibiotics13010086), 2024-01-16
Supplement: s1 [file s1]

**Table S1 Supplementary Materials:** Chemical compositions (%) of essential oils.

| Component <sup>a</sup>     | RI <sup>b</sup> | RI Lit. <sup>c</sup> | <i>C. citratus</i><br>(%) ± S.D. | <i>C. flexuosus</i><br>(%) ± S.D. | <i>C. martinii</i><br>(%) ± S.D. |
|----------------------------|-----------------|----------------------|----------------------------------|-----------------------------------|----------------------------------|
| tricyclene                 | 921             | 921                  | 0.15 ± 0.00                      | 0.17 ± 0.00                       | -                                |
| α-pinene                   | 932             | 932                  | 0.24 ± 0.01                      | 0.14 ± 0.01                       | -                                |
| camphene                   | 946             | 952                  | 1.94 ± 0.03                      | 1.81 ± 0.01                       | -                                |
| 6-methyl-5-hepten-2-one    | 986             | 988                  | 1.61 ± 0.00                      | 1.01 ± 0.04                       | -                                |
| limonene                   | 1028            | 1024                 | 0.27 ± 0.01                      | 0.84 ± 0.02                       | tr <sup>d</sup>                  |
| (Z)-β-ocimene              | 1038            | 1032                 | 0.18 ± 0.01                      | 0.19 ± 0.02                       | 0.21 ± 0.03                      |
| (E)-β-ocimene              | 1048            | 1044                 | tr                               | tr                                | 1.37 ± 0.06                      |
| pentyl propyl ketone       | 1073            | 1078                 | 1.20 ± 0.01                      | 0.82 ± 0.02                       | -                                |
| terpinolene                | 1087            | -                    | tr                               | -                                 | -                                |
| linalool                   | 1099            | 1095                 | 0.75 ± 0.05                      | 0.66 ± 0.07                       | 2.32 ± 0.15                      |
| exo-isocitral              | 1145            | 1145                 | 0.65 ± 0.01                      | 0.68 ± 0.07                       | -                                |
| trans-chrysanthemal        | 1149            | 1153                 | -                                | 0.14 ± 0.01                       | -                                |
| citronellal                | 1154            | 1148                 | 0.11 ± 0.01                      | tr                                | -                                |
| borneol                    | 1164            | 1165                 | 0.16 ± 0.01                      | 0.19 ± 0.07                       | -                                |
| (Z)-iso-citral             | 1165            | 1165                 | 1.35 ± 0.08                      | 1.55 ± 0.10                       | -                                |
| iso-geranial               | 1183            | 1184                 | 2.10 ± 0.10                      | 2.52 ± 0.24                       | -                                |
| α-terpineol                | 1190            | 1186                 | tr                               | tr                                | -                                |
| neral                      | 1241            | 1235                 | 33.84 ± 0.02                     | 33.22 ± 0.05                      | -                                |
| geraniol                   | 1255            | 1249                 | 4.63 ± 0.10                      | 5.17 ± 0.21                       | 81.41 ± 0.57                     |
| geranial                   | 1271            | 1267                 | 42.83 ± 0.20                     | 42.43 ± 0.30                      | 0.39 ± 0.00                      |
| geranyl acetate            | 1385            | 1379                 | 3.49 ± 0.08                      | 3.29 ± 0.12                       | 11.74 ± 0.18                     |
| (E)-caryophyllene          | 1420            | 1417                 | 1.83 ± 0.02                      | 2.78 ± 0.02                       | 2.11 ± 0.03                      |
| γ-cadinene                 | 1515            | 1513                 | 1.52 ± 0.05                      | 1.42 ± 0.05                       | -                                |
| δ-cadinene                 | 1525            | 1522                 | 0.19 ± 0.01                      | 0.20 ± 0.02                       | -                                |
| Total identified (%)       |                 |                      | 99.27                            | 99.43                             | 99.59                            |
| Grouped components (%)     |                 |                      |                                  |                                   |                                  |
| Monoterpene hydrocarbons   |                 |                      | 2.94                             | 3.23                              | 1.62                             |
| Oxygenated monoterpenes    |                 |                      | 89.98                            | 89.97                             | 95.86                            |
| Sesquiterpene hydrocarbons |                 |                      | 2.81                             | 1.83                              | 2.11                             |
| Others                     |                 |                      | 3.54                             | 4.4                               | -                                |

a) Elution order according to the HP-5MS column (30 m l. x 0.25 mm i.d., 0.1 mm f.t.); b) temperature-programmed linear retention index calculated using a C<sub>8</sub>-C<sub>30</sub> mixture of alkanes; c) retention index taken from the ADAMS library; d) traces, % < 0.1.
